# Supplementary material for: Efficacy of an Acellular Pertussis Vaccine among Adolescents and Adults
Source: Atypon-hosted journal article supplement (doi:10.1056/nejmoa050824), 2005-10-12
Supplement: nejm_ward_1555sa1.pdf [file nejm_ward_1555sa1.pdf]

## Supplementary Appendix

This appendix has been provided by the authors to give readers additional information about their work.

Supplement to: Ward JI, Cherry JD, Chang S-J, et al. Efficacy of an acellular pertussis vaccine among adolescents and adults. *N Engl J Med* 2005;353:1555-63.

**Supplementary Table -Summary of Subject allocation and follow-up  
Consort data**

- I. Approached/Accessed for eligibility = 3,450 (estimated\*)
- II. Excluded / not eligible = 66 (estimated\*)
- III. Refusals = 603 (estimated\*)
- IV. Enrolled, randomized, immunized = 2,781 (est 81%)
- V. Comparison of study groups (see table 1)
  - A. aP group (N=1391)**
    1. No (%) with 6 mon follow-up = 1363 (98%)
    2. No (%) with 12 mon follow-up = 1313 (94%)
    3. No (%) with 18 mon follow-up = 1,002 (72%)
    4. Total patient-years of follow-up = 2421
    5. No (%) with some loss of follow-up = 82 (6%)
    6. No (%) discontinued prematurely = 154 (11%)
    7. Analysis of all above available data
  - B. Hep A control group (N =1390)**
    1. No (%) with 6 mon follow-up = 1366 (98%)
    2. No (%) with 12 mon follow-up = 1325 (95%)
    3. No (%) with 18 mon follow-up = 1018 (74%)
    4. Total patient-years of follow-up = 2444
    5. No (%) with some loss of follow-up = 70 (5%)
    6. No (%) discontinued prematurely = 161 (12%)
    7. Analysis of all above available data

\*Study initiated in 1997. The estimates shown above are based upon detailed enrollment data at study coordinating site (largest subject contributor, 15% of subjects at all 8 national study sites).
